# Supplementary material for: Lipid multilayered particles: the role of chitosan on structure and morphology
Source: Royal Society of Chemistry journal article supplement (doi:10.1039/b924616a), 2010-01-01
Supplement: b924616a.pdf [file b924616a.pdf]

## Supporting Information

Yuri Gerelli<sup>1</sup>, Maria Teresa Di Bari, Antonio Deriu,  
Daniel Clemens and László Almásy

### 1 POPC and POPC/DMPS liposomes

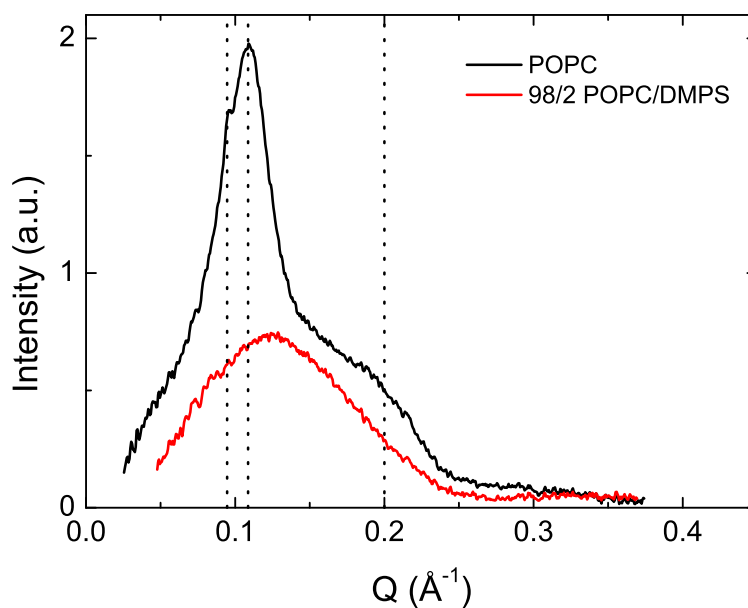

Figure 1: SAXS scattering intensity for POPC (black) and for POPC/DMPS (red) liposomes obtained as described in the text. Two main broad structural peaks around  $Q = 0.1 \text{\AA}^{-1}$  (and a second order peak at  $Q = 0.2 \text{\AA}^{-1}$ ) are present in POPC sample; they indicate that the samples are composed by multilamellar vesicles. These peaks disappear when liposomes were prepared in presence of a small fraction of ionic lipids (DMPS, 2% by weight) indicating, as expected, a strong correlation between lipid charge and particle morphology.

<sup>1</sup>Email: Yuri.Gerelli@fis.unipr.it

## 2 Form factor for the SANS analysis

The internal structure of liposomes and nanoparticles is described by the form factor  $F(Q, r, N)$  in Eq. 6 in the paper. Assuming an overall spherical particle shape, a single particle (the polydispersity is included at a later stage) is modelled in terms of a hollow-core, with radius  $r$  surrounded by a multilamellar shell with  $N$  repeating units. Each of them is composed by a lipid bilayer (with thickness  $2(t_h + t_t)$ ) surrounded, on both sides, by an inter-bilayer region (with thickness  $t_{cw}$ ) containing water and chitosan.

$$\begin{aligned}
 F(Q, r, N) = & \\
 & 4\pi \sum_{j=1}^N \left[ \Delta\rho_{cw} \int_{r_j^A}^{r_j^B} x^2 \frac{\sin(Qx)}{Qx} dx + \Delta\rho_h \int_{r_j^B}^{r_j^C} x^2 \frac{\sin(Qx)}{Qx} dx + \right. \\
 & \Delta\rho_t \int_{r_j^C}^{r_j^D} x^2 \frac{\sin(Qx)}{Qx} dx + \Delta\rho_h \int_{r_j^D}^{r_j^E} x^2 \frac{\sin(Qx)}{Qx} dx + \\
 & \left. \Delta\rho_{cw} \int_{r_j^E}^{r_j^F} x^2 \frac{\sin(Qx)}{Qx} dx \right] \quad (1)
 \end{aligned}$$

The integration limits are defined by:

- $r_j^A = r + 2(j-1)(t_h + t_t + t_{cw}) \equiv r + (j-1)d \rightarrow$  inner radius of the  $j$ -th repeating unit;
- $r_j^B = r_j^A + t_{cw} \rightarrow$  inner radius of the  $j$ -th lipid bilayer;
- $r_j^C = r_j^B + t_h \rightarrow$  outer radius of the  $j$ -th lipid bilayer headgroup;
- $r_j^D = r_j^C + 2t_t \rightarrow$  outer radius of the  $j$ -th lipid bilayer hydrophobic region;
- $r_j^E = r_j^D + t_h \rightarrow$  outer radius of the  $j$ -th lipid bilayer;
- $r_j^F = r_j^E + t_{cw} \equiv r_{j+1}^A \rightarrow$  outer radius of the  $j$ -th lipid bilayer;

In Eq. 1 three contrast terms are present: they are the differences between the scattering length density of the solvent  $\rho_s$  and that of each nanoparticle region:

- $\Delta\rho_{cw} = \rho_s - \rho_{cw}$  is the contrast for the interlayer region,
- $\Delta\rho_h = \rho_s - \rho_h$  is the contrast for the hydrophilic region of the lipid bilayer
- $\Delta\rho_t = \rho_s - \rho_t$  is the contrast for the hydrophobic region of the lipid bilayer

The contrast relative to the hollow core ( $\Delta\rho_0 = \rho_s - \rho_0$ ) does not appear since the core region, is supposed to be filled by solvent only. It has then the same scattering length density of the solvent  $\rho_s$  and therefore null contrast. All the contrasts have been evaluated on the basis of the sample composition and have then been kept fixed during the fit procedure. A typical simultaneous fit of three SANS profiles related to the same sample in different lipids-solvents configurations is shown in Figure 2.

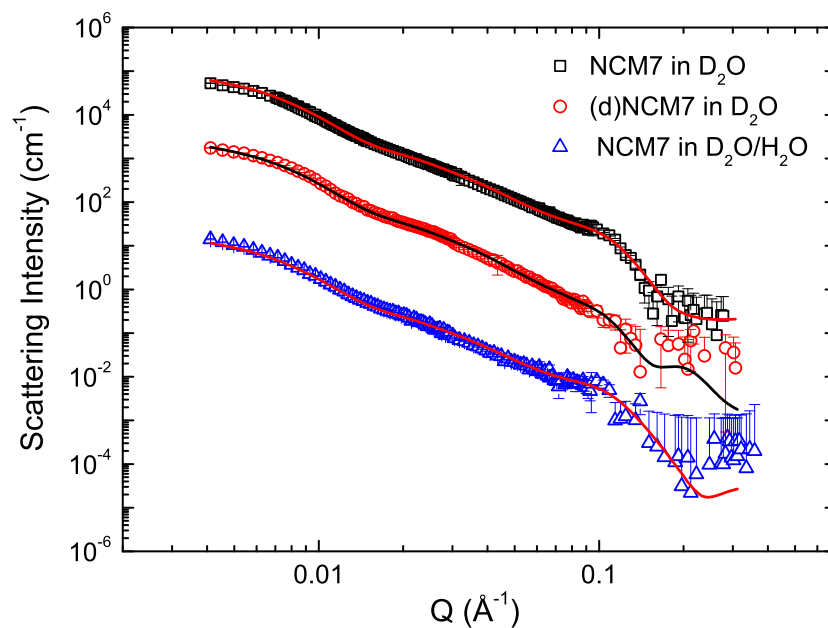

Figure 2: Scattering profiles of NCM7 particles using three different contrast configurations. The intensities have been rescaled to improve the visibility of the curves. The reduced  $\chi^2$  resulting from the fitting procedure is  $\chi^2 = 0.7$
